# Supplementary material for: Surveillance of Trypanosoma cruzi infection in Triatomine vectors, feral dogs and cats, and wild animals in and around El Paso county, Texas, and New Mexico
Source: PLoS Negl Trop Dis. 2021 Feb 18;15(2):e0009147. doi: 10.1371/journal.pntd.0009147 (PMC7924784; doi:10.1371/journal.pntd.0009147)
Supplement: S1 Table — (XLSX) [file pntd.0009147.s002.xlsx]

## Sheet: S1 Table
S1 Table. Coordinates of animal capture locations.
Sample ID	Date a	Location	Coordinates (lat, long)	Species	Trapping method	T. cruzi Infection Status	DTU b	Bloodmeal c
ANA 111	n.av.	Anthony, NM	32.018438, -106.682479	T. rubida	Hand collection with tweezers	Positive	n.d.	mouse + rat
ANA 112	n.av.	Anthony, NM	32.018438, -106.682479	T. rubida	Hand collection with tweezers	Positive	TcI	S. audubonii
ANA 113	n.av.	Anthony, NM	32.018438, -106.682479	T. rubida	Hand collection with tweezers	Positive	TcI	M. musculus
ANA 114	n.av.	Anthony, NM	32.018438, -106.682479	T. rubida	Hand collection with tweezers	Positive	TcI	M. lucifugus
ANA 115	n.av.	Anthony, NM	32.018438, -106.682479	T. rubida	Hand collection with tweezers	Positive	TcI	P. merriami
ANA 116	n.av.	Anthony, NM	32.018438, -106.682479	T. rubida	Hand collection with tweezers	Positive	TcI+TcIV	M. lucifugus
ANA 117	n.av.	Anthony, NM	32.018438, -106.682479	T. rubida	Hand collection with tweezers	Positive	TcI	n.d.
ANA 1701	n.av.	Anthony, NM	32.018438, -106.682479	T. rubida	Hand collection with tweezers	Positive	TcI	P. maniculatus
ANA 1703	n.av.	Anthony, NM	32.018438, -106.682479	T. rubida	Hand collection with tweezers	Negative	n.a.	n.a.
ANA 1704	n.av.	Anthony, NM	32.018438, -106.682479	T. rubida	Hand collection with tweezers	Negative	n.a.	n.a.
ANA 1706	n.av.	Anthony, NM	32.018438, -106.682479	T. rubida	Hand collection with tweezers	Negative	n.a.	n.a.
ANA 1707	n.av.	Anthony, NM	32.018438, -106.682479	T. rubida	Hand collection with tweezers	Positive	TcI+TcIV	M. musculus
ANA 1708	n.av.	Anthony, NM	32.018438, -106.682479	T. rubida	Hand collection with tweezers	Negative	n.a.	n.a.
ANA 1709	n.av.	Anthony, NM	32.018438, -106.682479	T. rubida	Hand collection with tweezers	Negative	n.a.	n.a.
ANA 1710	n.av.	Anthony, NM	32.018438, -106.682479	T. rubida	Hand collection with tweezers	Negative	n.a.	n.a.
ANA 1711	n.av.	Anthony, NM	32.018438, -106.682479	T. rubida	Hand collection with tweezers	Negative	n.a.	n.a.
ANA 1712	n.av.	Anthony, NM	32.018438, -106.682479	T. rubida	Hand collection with tweezers	Negative	n.a.	n.a.
ANA 1713	n.av.	Anthony, NM	32.018438, -106.682479	T. rubida	Hand collection with tweezers	Negative	n.a.	n.a.
ANA 1714	n.av.	Anthony, NM	32.018438, -106.682479	T. rubida	Hand collection with tweezers	Negative	n.a.	n.a.
ANA 1715	n.av.	Anthony, NM	32.018438, -106.682479	T. rubida	Hand collection with tweezers	Negative	n.a.	n.a.
ANA 1716	n.av.	Anthony, NM	32.018438, -106.682479	T. rubida	Hand collection with tweezers	Negative	n.a.	n.a.
ANA 1719	n.av.	Anthony, NM	32.018438, -106.682479	T. rubida	Hand collection with tweezers	Negative	n.a.	n.a.
ANA 1720	n.av.	Anthony, NM	32.018438, -106.682479	T. rubida	Hand collection with tweezers	Positive	TcI	M. musculus
ANA 1721	n.av.	Anthony, NM	32.018438, -106.682479	T. rubida	Hand collection with tweezers	Positive	TcI	L. californicus
ANA 1722	n.av.	Anthony, NM	32.018438, -106.682479	T. rubida	Hand collection with tweezers	Positive	TcI	n.d.
ANA 1723	n.av.	Anthony, NM	32.018438, -106.682479	T. rubida	Hand collection with tweezers	Positive	TcI	mouse + rabbit
ANA 1724	n.av.	Anthony, NM	32.018438, -106.682479	T. rubida	Hand collection with tweezers	Positive	TcI	dog + mouse
ANA 1725	n.av.	Anthony, NM	32.018438, -106.682479	T. rubida	Hand collection with tweezers	Negative	n.a.	n.a.
ANA 1726	n.av.	Anthony, NM	32.018438, -106.682479	T. rubida	Hand collection with tweezers	Positive	TcI	dog + mouse
ANA 1727	n.av.	Anthony, NM	32.018438, -106.682479	T. rubida	Hand collection with tweezers	Negative	n.a.	n.a.
ANA 1728	n.av.	Anthony, NM	32.018438, -106.682479	T. rubida	Hand collection with tweezers	Negative	n.a.	n.a.
ANA 1729	n.av.	Anthony, NM	32.018438, -106.682479	T. rubida	Hand collection with tweezers	Negative	n.a.	n.a.
ANA 1730	n.av.	Anthony, NM	32.018438, -106.682479	T. rubida	Hand collection with tweezers	Negative	n.a.	n.a.
ANA 1731	n.av.	Anthony, NM	32.018438, -106.682479	T. rubida	Hand collection with tweezers	Positive	TcI	n.d.
ANA 1733	n.av.	Anthony, NM	32.018438, -106.682479	T. rubida	Hand collection with tweezers	Negative	n.a.	n.a.
ANA 1734	n.av.	Anthony, NM	32.018438, -106.682479	T. rubida	Hand collection with tweezers	Negative	n.a.	n.a.
ANA 1735	n.av.	Anthony, NM	32.018438, -106.682479	T. rubida	Hand collection with tweezers	Negative	n.a.	n.a.
ANA 1736	n.av.	Anthony, NM	32.018438, -106.682479	T. rubida	Hand collection with tweezers	Negative	n.a.	n.a.
ANA 1737	n.av.	Anthony, NM	32.018438, -106.682479	T. rubida	Hand collection with tweezers	Positive	TcI	mouse + bat
ANA 1738	n.av.	Anthony, NM	32.018438, -106.682479	T. rubida	Hand collection with tweezers	Negative	n.a.	n.a.
ANA 1739	n.av.	Anthony, NM	32.018438, -106.682479	T. rubida	Hand collection with tweezers	Negative	n.a.	n.a.
ANA 1740	n.av.	Anthony, NM	32.018438, -106.682479	T. rubida	Hand collection with tweezers	Positive	TcI	human + mouse
ANF 1	n.av.	Anthony, NM	32.018438, -106.682479	T. rubida	Hand collection with tweezers	Positive	TcI+TcIV	H. sapiens
ANF 10	n.av.	Anthony, NM	32.018438, -106.682479	T. rubida	Hand collection with tweezers	Positive	TcI	M. lucifugus
ANF 11	n.av.	Anthony, NM	32.018438, -106.682479	T. rubida	Hand collection with tweezers	Positive	TcI	n.d.
ANF 12	n.av.	Anthony, NM	32.018438, -106.682479	T. rubida	Hand collection with tweezers	Positive	TcI	n.d.
ANF 13	n.av.	Anthony, NM	32.018438, -106.682479	T. rubida	Hand collection with tweezers	Positive	TcI	dog + mouse
ANF 14	n.av.	Anthony, NM	32.018438, -106.682479	T. rubida	Hand collection with tweezers	Negative	n.a.	n.a.
ANF 15	n.av.	Anthony, NM	32.018438, -106.682479	T. rubida	Hand collection with tweezers	Positive	TcI	H. sapiens
ANF 16	n.av.	Anthony, NM	32.018438, -106.682479	T. rubida	Hand collection with tweezers	Positive	TcI	human + mouse
ANF 17	n.av.	Anthony, NM	32.018438, -106.682479	T. rubida	Hand collection with tweezers	Positive	TcI	M. musculus
ANF 18	n.av.	Anthony, NM	32.018438, -106.682479	T. rubida	Hand collection with tweezers	Negative	n.a.	n.a.
ANF 19	n.av.	Anthony, NM	32.018438, -106.682479	T. rubida	Hand collection with tweezers	Positive	TcI	n.d.
ANF 2	n.av.	Anthony, NM	32.018438, -106.682479	T. rubida	Hand collection with tweezers	Positive	TcI	F. catus
ANF 20	n.av.	Anthony, NM	32.018438, -106.682479	T. rubida	Hand collection with tweezers	Negative	n.a.	n.a.
ANF 21	n.av.	Anthony, NM	32.018438, -106.682479	T. rubida	Hand collection with tweezers	Negative	n.a.	n.a.
ANF 23i	n.av.	Anthony, NM	32.018438, -106.682479	T. rubida	Hand collection with tweezers	Positive	TcI	M. musculus
ANF 23	n.av.	Anthony, NM	32.018438, -106.682479	T. rubida	Hand collection with tweezers	Positive	TcI	mouse + squirrel
ANF 25	n.av.	Anthony, NM	32.018438, -106.682479	T. rubida	Hand collection with tweezers	Positive	TcI	M. musculus
ANF 26	n.av.	Anthony, NM	32.018438, -106.682479	T. rubida	Hand collection with tweezers	Positive	TcI	H. sapiens
ANF 27	n.av.	Anthony, NM	32.018438, -106.682479	T. rubida	Hand collection with tweezers	Positive	TcI	M. musculus
ANF 28	n.av.	Anthony, NM	32.018438, -106.682479	T. rubida	Hand collection with tweezers	Negative	n.a.	n.a.
ANF 29	n.av.	Anthony, NM	32.018438, -106.682479	T. rubida	Hand collection with tweezers	Positive	TcI	M. musculus
ANF 29 L	n.av.	Anthony, NM	32.018438, -106.682479	T. rubida	Hand collection with tweezers	Negative	n.a.	n.a.
ANF 3	n.av.	Anthony, NM	32.018438, -106.682479	T. rubida	Hand collection with tweezers	Positive	TcI	C. lupus familiaris
ANF 30	n.av.	Anthony, NM	32.018438, -106.682479	T. rubida	Hand collection with tweezers	Positive	TcI	C. lupus familiaris
ANF 30 L	n.av.	Anthony, NM	32.018438, -106.682479	T. rubida	Hand collection with tweezers	Positive	TcI	n.d.
ANF 31	n.av.	Anthony, NM	32.018438, -106.682479	T. rubida	Hand collection with tweezers	Positive	TcI	mouse + rat
ANF 32	n.av.	Anthony, NM	32.018438, -106.682479	T. rubida	Hand collection with tweezers	Positive	TcI	n.d.
ANF 33	n.av.	Anthony, NM	32.018438, -106.682479	T. rubida	Hand collection with tweezers	Negative	n.a.	n.a.
ANF 35	n.av.	Anthony, NM	32.018438, -106.682479	T. rubida	Hand collection with tweezers	Positive	TcI	M. musculus
ANF 36	n.av.	Anthony, NM	32.018438, -106.682479	T. rubida	Hand collection with tweezers	Positive	TcI	n.d.
ANF 37	n.av.	Anthony, NM	32.018438, -106.682479	T. rubida	Hand collection with tweezers	Positive	TcI	C. lupus familiaris
ANF 38	n.av.	Anthony, NM	32.018438, -106.682479	T. rubida	Hand collection with tweezers	Positive	TcI	squirrel + rabbit
ANF 39	n.av.	Anthony, NM	32.018438, -106.682479	T. rubida	Hand collection with tweezers	Positive	TcI	n.d.
ANF 4	n.av.	Anthony, NM	32.018438, -106.682479	T. rubida	Hand collection with tweezers	Positive	TcI	n.d.
ANF 41	n.av.	Anthony, NM	32.018438, -106.682479	T. rubida	Hand collection with tweezers	Positive	TcI	n.d.
ANF 42	n.av.	Anthony, NM	32.018438, -106.682479	T. rubida	Hand collection with tweezers	Positive	TcI	M. musculus
ANF 43	n.av.	Anthony, NM	32.018438, -106.682479	T. rubida	Hand collection with tweezers	Positive	TcI	n.d.
ANF 44	n.av.	Anthony, NM	32.018438, -106.682479	T. rubida	Hand collection with tweezers	Positive	TcI	E. caballus
ANF 45	n.av.	Anthony, NM	32.018438, -106.682479	T. rubida	Hand collection with tweezers	Positive	TcI	n.d.
ANF 46	n.av.	Anthony, NM	32.018438, -106.682479	T. rubida	Hand collection with tweezers	Positive	TcI	n.d.
ANF 46 L	n.av.	Anthony, NM	32.018438, -106.682479	T. rubida	Hand collection with tweezers	Positive	TcI	n.d.
ANF 47	n.av.	Anthony, NM	32.018438, -106.682479	T. rubida	Hand collection with tweezers	Negative	n.a.	n.a.
ANF 48	n.av.	Anthony, NM	32.018438, -106.682479	T. rubida	Hand collection with tweezers	Positive	TcI	mouse + rat
ANF 48 L	n.av.	Anthony, NM	32.018438, -106.682479	T. rubida	Hand collection with tweezers	Positive	TcI	mouse + rat
ANF 50	n.av.	Anthony, NM	32.018438, -106.682479	T. rubida	Hand collection with tweezers	Positive	TcI	mouse + rabbit
ANF 51	n.av.	Anthony, NM	32.018438, -106.682479	T. rubida	Hand collection with tweezers	Positive	TcI	A. interpres
ANF 52	n.av.	Anthony, NM	32.018438, -106.682479	T. rubida	Hand collection with tweezers	Positive	TcI	n.d.
ANF 53	n.av.	Anthony, NM	32.018438, -106.682479	T. rubida	Hand collection with tweezers	Positive	TcI	mouse + rat
ANF 55	n.av.	Anthony, NM	32.018438, -106.682479	T. rubida	Hand collection with tweezers	Positive	TcI+TcIV	n.d.
ANF 56	n.av.	Anthony, NM	32.018438, -106.682479	T. rubida	Hand collection with tweezers	Positive	TcI	n.d.
ANF 57	n.av.	Anthony, NM	32.018438, -106.682479	T. rubida	Hand collection with tweezers	Positive	TcI	n.d.
ANF 58	n.av.	Anthony, NM	32.018438, -106.682479	T. rubida	Hand collection with tweezers	Negative	n.a.	n.a.
ANF 59	n.av.	Anthony, NM	32.018438, -106.682479	T. rubida	Hand collection with tweezers	Negative	n.a.	n.a.
ANF 59 L	n.av.	Anthony, NM	32.018438, -106.682479	T. rubida	Hand collection with tweezers	Positive	TcI	M. musculus
ANF 6	n.av.	Anthony, NM	32.018438, -106.682479	T. rubida	Hand collection with tweezers	Negative	n.a.	n.a.
ANF 60	n.av.	Anthony, NM	32.018438, -106.682479	T. rubida	Hand collection with tweezers	Negative	n.a.	n.a.
ANF 61	n.av.	Anthony, NM	32.018438, -106.682479	T. rubida	Hand collection with tweezers	Positive	TcI	n.d.
ANF 62	n.av.	Anthony, NM	32.018438, -106.682479	T. rubida	Hand collection with tweezers	Positive	TcI	M. musculus
ANF 63	n.av.	Anthony, NM	32.018438, -106.682479	T. rubida	Hand collection with tweezers	Positive	TcI	L. californicus
ANF 64	n.av.	Anthony, NM	32.018438, -106.682479	T. rubida	Hand collection with tweezers	Positive	TcI	M. musculus
ANF 65	n.av.	Anthony, NM	32.018438, -106.682479	T. rubida	Hand collection with tweezers	Negative	n.a.	n.a.
ANF 66	n.av.	Anthony, NM	32.018438, -106.682479	T. rubida	Hand collection with tweezers	Positive	TcI	n.d.
ANF 67	n.av.	Anthony, NM	32.018438, -106.682479	T. rubida	Hand collection with tweezers	Positive	TcI	n.d.
ANF 68	n.av.	Anthony, NM	32.018438, -106.682479	T. rubida	Hand collection with tweezers	Positive	TcI	H. sapiens
ANF 69	n.av.	Anthony, NM	32.018438, -106.682479	T. rubida	Hand collection with tweezers	Positive	TcI	n.d.
ANF 7	n.av.	Anthony, NM	32.018438, -106.682479	T. rubida	Hand collection with tweezers	Positive	TcI	M. musculus
ANF 70	n.av.	Anthony, NM	32.018438, -106.682479	T. rubida	Hand collection with tweezers	Negative	n.a.	n.a.
ANF 71	n.av.	Anthony, NM	32.018438, -106.682479	T. rubida	Hand collection with tweezers	Negative	n.a.	n.a.
ANF 72	n.av.	Anthony, NM	32.018438, -106.682479	T. rubida	Hand collection with tweezers	Positive	TcI	S. audubonii
ANF 73	n.av.	Anthony, NM	32.018438, -106.682479	T. rubida	Hand collection with tweezers	Positive	TcI	mouse + rat
ANF 74	n.av.	Anthony, NM	32.018438, -106.682479	T. rubida	Hand collection with tweezers	Positive	TcI	n.d.
ANF 75	n.av.	Anthony, NM	32.018438, -106.682479	T. rubida	Hand collection with tweezers	Positive	TcI	mouse + rat
ANF 76	n.av.	Anthony, NM	32.018438, -106.682479	T. rubida	Hand collection with tweezers	Positive	TcI	S. audubonii
ANF 77	n.av.	Anthony, NM	32.018438, -106.682479	T. rubida	Hand collection with tweezers	Positive	TcI	C. lupus familiaris
ANF 78	n.av.	Anthony, NM	32.018438, -106.682479	T. rubida	Hand collection with tweezers	Positive	TcI	M. musculus
ANF 79	n.av.	Anthony, NM	32.018438, -106.682479	T. rubida	Hand collection with tweezers	Negative	n.a.	n.a.
ANF 8	n.av.	Anthony, NM	32.018438, -106.682479	T. rubida	Hand collection with tweezers	Negative	n.a.	n.a.
ANF 80	n.av.	Anthony, NM	32.018438, -106.682479	T. rubida	Hand collection with tweezers	Positive	TcI	M. musculus
ANF 81	n.av.	Anthony, NM	32.018438, -106.682479	T. rubida	Hand collection with tweezers	Positive	TcI	mouse + rabbit
ANF 82	n.av.	Anthony, NM	32.018438, -106.682479	T. rubida	Hand collection with tweezers	Negative	n.a.	n.a.
ANF 83	n.av.	Anthony, NM	32.018438, -106.682479	T. rubida	Hand collection with tweezers	Negative	n.a.	n.a.
ANF 84	n.av.	Anthony, NM	32.018438, -106.682479	T. rubida	Hand collection with tweezers	Positive	TcI	mouse + rabbit
ANF 85	n.av.	Anthony, NM	32.018438, -106.682479	T. rubida	Hand collection with tweezers	Positive	TcI+TcIV	mouse + rat
ANF 87	n.av.	Anthony, NM	32.018438, -106.682479	T. rubida	Hand collection with tweezers	Negative	n.a.	n.a.
ANF 88	n.av.	Anthony, NM	32.018438, -106.682479	T. rubida	Hand collection with tweezers	Positive	TcI	A. interpres
ANF 89	n.av.	Anthony, NM	32.018438, -106.682479	T. rubida	Hand collection with tweezers	Positive	TcI	C. lupus familiaris
ANF 9	n.av.	Anthony, NM	32.018438, -106.682479	T. rubida	Hand collection with tweezers	Positive	TcIV	M. musculus
ANF 90	n.av.	Anthony, NM	32.018438, -106.682479	T. rubida	Hand collection with tweezers	Positive	TcI	M. musculus
ANF 91	n.av.	Anthony, NM	32.018438, -106.682479	T. rubida	Hand collection with tweezers	Positive	TcI	H. sapiens
ANF 92	n.av.	Anthony, NM	32.018438, -106.682479	T. rubida	Hand collection with tweezers	Negative	n.a.	n.a.
ANF 93	n.av.	Anthony, NM	32.018438, -106.682479	T. rubida	Hand collection with tweezers	Positive	TcI	mouse + rat
ANF 94	n.av.	Anthony, NM	32.018438, -106.682479	T. rubida	Hand collection with tweezers	Negative	n.a.	n.a.
ANF 95	n.av.	Anthony, NM	32.018438, -106.682479	T. rubida	Hand collection with tweezers	Negative	n.a.	n.a.
ANF 96	n.av.	Anthony, NM	32.018438, -106.682479	T. rubida	Hand collection with tweezers	Positive	TcI	M. musculus
ANF 97	n.av.	Anthony, NM	32.018438, -106.682479	T. rubida	Hand collection with tweezers	Positive	TcI	A. interpres
ANF 98	n.av.	Anthony, NM	32.018438, -106.682479	T. rubida	Hand collection with tweezers	Positive	TcI	mouse + rabbit
ANF 22	n.av.	Anthony, NM	32.018438, -106.682479	T. rubida	Hand collection with tweezers	Negative	n.a.	n.a.
CO 1	2019-03-18	El Paso, Tx	31.994586, -106.466804	C. latrans	Found	Positive	TcI	n.d.
CMsp	2019-03-18	El Paso, Tx	31.994586, -106.466804	P. eremicus	Sherman trap	Positive	TcI+TcIV	n.d.
EP 30	2018-05-25	El Paso, Tx	31.841268, -105.972234	T. gerstaeckeri	Vane trap	Positive	TcI	cat + mouse
EP 33	2018-05-25	El Paso, Tx	31.841268, -105.972234	T. gerstaeckeri	Vane trap	Positive	TcI	dog + mouse
EP 18	2016-06-08	El Paso, Tx	31.841268, -105.972234	T. rubida	Vane trap	Negative	n.a.	n.a.
EP 1948	2019-08-09	El Paso, Tx	31.960312, -106.592301	T. rubida	Community	Positive	TcI	C. lupus familiaris
EP 20	2017-07-26	El Paso, Tx	31.905809, -106.052301	T. rubida	Community	Negative	n.a.	n.a.
EP 21	2017-07-28	El Paso, Tx	31.905809, -106.052301	T. rubida	Vane trap	Negative	n.a.	n.a.
EP 22	2017-07-28	El Paso, Tx	31.905809, -106.052301	T. protracta	Vane trap	Positive	TcI	M. musculus
EP 23	2018	El Paso, Tx	31.905809, -106.052301	T. protracta	Community	Negative	n.a.	n.a.
EP 16	2016-06-10	El Paso, Tx	31.869519, -106.517828	T. rubida	Community	Positive	TcI	cat + mouse
EP 17	2016-06-10	El Paso, Tx	31.873346, -106.526261	T. rubida	Community	Negative	n.a.	n.a.
EP 34	2018-06-25	El Paso, Tx	31.869519, -106.517828	T. rubida	Community	Negative	n.a.	n.a.
Ep 35	2019-04-30	El Paso, Tx	31.869519, -106.517828	T. rubida	Community	Negative	n.a.	n.a.
EP 36	2019-04-30	El Paso, Tx	31.869519, -106.517828	T. rubida	Community	Negative	n.a.	n.a.
EP 37	2019-04-30	El Paso, Tx	31.869519, -106.517828	T. rubida	Community	Negative	n.a.	n.a.
EP 38i	2019-05-10	El Paso, Tx	31.869519, -106.517828	T. rubida	Community	Negative	n.a.	n.a.
EP 39	2019-05-10	El Paso, Tx	31.869519, -106.517828	T. rubida	Community	Positive	TcI	C. lupus familiaris
EP 39i	2019-05-10	El Paso, Tx	31.869519, -106.517828	T. rubida	Vane trap	Positive	TcI	M. musculus
EP 40	2019-07-16	El Paso, Tx	31.869519, -106.517828	T. rubida	Community	Negative	n.a.	n.a.
EP 40i	2019-05-17	El Paso, Tx	31.869519, -106.517828	T. rubida	Vane trap	Positive	n.d.	M. musculus
Ep 41	2019-05-17	El Paso, Tx	31.869519, -106.517828	T. rubida	Community	Negative	n.a.	n.a.
EP 42	2019-05-17	El Paso, Tx	31.869519, -106.517828	T. rubida	Community	Negative	n.a.	n.a.
GF 1	2019-03-18	El Paso, Tx	31.994586, -106.466804	U. cinereoargenteus	Found	Positive	TcI	n.d.
IMA 1706	2017-06-06	IMRS	30.777043, -105.015780	T. rubida	Hand collection with tweezers	Positive	n.d.	rat + rabbit
IMA 1707	2017-06-06	IMRS	30.777043, -105.015780	T. rubida	Hand collection with tweezers	Positive	TcI	mouse + rabbit
IMA 1708	2017-06-06	IMRS	30.777043, -105.015780	T. rubida	Hand collection with tweezers	Positive	TcI	n.d.
IMA 1710	2017-06-06	IMRS	30.777043, -105.015780	T. rubida	Hand collection with tweezers	Positive	TcI	mouse + rabbit
IMA 1713	2017-06-06	IMRS	30.777043, -105.015780	T. rubida	Hand collection with tweezers	Positive	TcI	mouse + bat
IMA 1714	2017-06-06	IMRS	30.777043, -105.015780	T. rubida	Hand collection with tweezers	Positive	TcI	mouse + bat
IMA 1715	2017-06-06	IMRS	30.777043, -105.015780	T. rubida	Hand collection with tweezers	Positive	TcI	N. leudocon
IMA 1716	2017-06-06	IMRS	30.777043, -105.015780	T. rubida	Hand collection with tweezers	Positive	TcI	mouse + bat
IMA 1717	2017-06-06	IMRS	30.777043, -105.015780	T. rubida	Hand collection with tweezers	Positive	TcI	A. pallidus
IMA 1718	2017-06-06	IMRS	30.777043, -105.015780	T. rubida	Hand collection with tweezers	Positive	TcI	N. leudocon
IMA 1719	2017-06-06	IMRS	30.777043, -105.015780	T. rubida	Hand collection with tweezers	Negative	n.a.	n.a.
IMA 1720	2017-06-06	IMRS	30.777043, -105.015780	T. rubida	Hand collection with tweezers	Negative	n.a.	n.a.
IMA 1721	2017-06-06	IMRS	30.777043, -105.015780	T. rubida	Hand collection with tweezers	Positive	TcI	mouse + rabbit
IMA 1722	2017-06-06	IMRS	30.777043, -105.015780	T. rubida	Hand collection with tweezers	Positive	TcI	mouse + rabbit
IMA 1723	2017-06-06	IMRS	30.777043, -105.015780	T. rubida	Hand collection with tweezers	Positive	TcI	mouse + bat
IMA 1724	2017-06-06	IMRS	30.777043, -105.015780	T. rubida	Hand collection with tweezers	Positive	TcI	H. sapiens
IMA 1725	2017-06-06	IMRS	30.777043, -105.015780	T. rubida	Hand collection with tweezers	Positive	TcI	human + bat
IMA 1726	2017-06-06	IMRS	30.777043, -105.015780	T. rubida	Hand collection with tweezers	Positive	TcI	rat + rabbit
IMA 1728	2017-06-06	IMRS	30.777043, -105.015780	T. rubida	Hand collection with tweezers	Positive	TcIV	A. pallidus
IMR 1 (1)	2016-07-10	IMRS	30.777043, -105.015780	T. rubida	Hand collection with tweezers	Negative	n.a.	n.a.
IMR 1501	2016-07-10	IMRS	30.777043, -105.015780	T. rubida	Vane trap	Negative	n.a.	n.a.
IMR 1502	2016-07-10	IMRS	30.777043, -105.015780	T. rubida	Vane trap	Positive	TcI	rat + rabbit
IMR 1503	2016-07-10	IMRS	30.777043, -105.015780	T. rubida	Vane trap	Positive	TcI	rat + rabbit
IMR 1505	2016-07-10	IMRS	30.777043, -105.015780	T. rubida	Vane trap	Negative	n.a.	n.a.
IMR 1506	2016-07-10	IMRS	30.777043, -105.015780	T. rubida	Vane trap	Negative	n.a.	n.a.
IMR 1507	2016-07-10	IMRS	30.777043, -105.015780	T. rubida	Vane trap	Negative	n.a.	n.a.
IMR 1508	2016-07-10	IMRS	30.777043, -105.015780	T. rubida	Vane trap	Positive	TcI	rat + rabbit
IMR 1509	2016-07-10	IMRS	30.777043, -105.015780	T. rubida	Vane trap	Positive	TcI	N. leudocon
IMR 1510	2016-07-10	IMRS	30.777043, -105.015780	T. rubida	Vane trap	Negative	n.a.	n.a.
IMR 1511	2016-07-10	IMRS	30.777043, -105.015780	T. rubida	Vane trap	Positive	TcI	rat + rabbit
IMR 1512	2016-07-10	IMRS	30.777043, -105.015780	T. rubida	Hand collection with tweezers	Positive	TcI	H. sapiens
IMR 1513	2016-07-10	IMRS	30.777043, -105.015780	T. rubida	Hand collection with tweezers	Negative	n.a.	n.a.
IMR 1514	2016-07-10	IMRS	30.777043, -105.015780	T. rubida	Hand collection with tweezers	Positive	TcI	N. leudocon
LCB 1701	n.av.	Las Cruces, NM	32.293721, -106.654317	T. rubida	Hand collection with tweezers	Negative	n.a.	n.a.
LCB 1702	n.av.	Las Cruces, NM	32.293721, -106.654317	T. rubida	Hand collection with tweezers	Positive	TcI+TcIV	n.d.
LCB 1704	n.av.	Las Cruces, NM	32.293721, -106.654317	T. rubida	Hand collection with tweezers	Negative	n.a.	n.a.
LCB 1705	n.av.	Las Cruces, NM	32.293721, -106.654317	T. rubida	Hand collection with tweezers	Positive	TcI	n.d.
LCB 1707	n.av.	Las Cruces, NM	32.293721, -106.654317	T. rubida	Hand collection with tweezers	Positive	TcI	n.d.
LCB 1708	n.av.	Las Cruces, NM	32.293721, -106.654317	T. rubida	Hand collection with tweezers	Positive	TcI	n.d.
LCB 1709	n.av.	Las Cruces, NM	32.293721, -106.654317	T. rubida	Hand collection with tweezers	Positive	TcI	n.d.
LCB 1710	n.av.	Las Cruces, NM	32.293721, -106.654317	T. rubida	Hand collection with tweezers	Positive	TcI	n.d.
LCB 1711	n.av.	Las Cruces, NM	32.293721, -106.654317	T. rubida	Hand collection with tweezers	Positive	TcI	n.d.
LCB 1712	n.av.	Las Cruces, NM	32.293721, -106.654317	T. rubida	Hand collection with tweezers	Positive	TcI	n.d.
LCB 1713	n.av.	Las Cruces, NM	32.293721, -106.654317	T. rubida	Hand collection with tweezers	Positive	TcI	n.d.
LCB 1714	n.av.	Las Cruces, NM	32.293721, -106.654317	T. rubida	Hand collection with tweezers	Positive	TcI	n.d.
LCB 1715	n.av.	Las Cruces, NM	32.293721, -106.654317	T. rubida	Hand collection with tweezers	Positive	TcI	n.d.
LCB 1716	n.av.	Las Cruces, NM	32.293721, -106.654317	T. rubida	Hand collection with tweezers	Positive	TcI	n.d.
LCB 1717	n.av.	Las Cruces, NM	32.293721, -106.654317	T. rubida	Hand collection with tweezers	Positive	TcI	n.d.
LCB 1718	n.av.	Las Cruces, NM	32.293721, -106.654317	T. rubida	Hand collection with tweezers	Positive	TcI	n.d.
LCB 1719	n.av.	Las Cruces, NM	32.293721, -106.654317	T. rubida	Hand collection with tweezers	Negative	n.a.	n.a.
LCB 1720	n.av.	Las Cruces, NM	32.293721, -106.654317	T. rubida	Hand collection with tweezers	Negative	n.a.	n.a.
LCB 1721	n.av.	Las Cruces, NM	32.293721, -106.654317	T. rubida	Hand collection with tweezers	Positive	TcI	n.d.
LCB 1722	n.av.	Las Cruces, NM	32.293721, -106.654317	T. rubida	Hand collection with tweezers	Negative	n.a.	n.a.
LCB 1723	n.av.	Las Cruces, NM	32.293721, -106.654317	T. rubida	Hand collection with tweezers	Positive	TcI	n.d.
LCB 1724	n.av.	Las Cruces, NM	32.293721, -106.654317	T. rubida	Hand collection with tweezers	Positive	TcI	n.d.
LCB 1725	n.av.	Las Cruces, NM	32.293721, -106.654317	T. rubida	Hand collection with tweezers	Positive	TcI	n.d.
LCB 1726	n.av.	Las Cruces, NM	32.293721, -106.654317	T. rubida	Hand collection with tweezers	Positive	TcI+TcIV	n.d.
LCB 1727	n.av.	Las Cruces, NM	32.293721, -106.654317	T. rubida	Hand collection with tweezers	Positive	TcI	n.d.
LCB 1733	n.av.	Las Cruces, NM	32.293721, -106.654317	T. rubida	Hand collection with tweezers	Positive	TcI	n.d.
LCB 1734	n.av.	Las Cruces, NM	32.293721, -106.654317	T. rubida	Hand collection with tweezers	Positive	TcI	n.d.
LCB 1736	n.av.	Las Cruces, NM	32.293721, -106.654317	T. rubida	Hand collection with tweezers	Positive	TcI	n.d.
LCB 1737	n.av.	Las Cruces, NM	32.293721, -106.654317	T. rubida	Hand collection with tweezers	Positive	TcI	n.d.
LCB 1738	n.av.	Las Cruces, NM	32.293721, -106.654317	T. rubida	Hand collection with tweezers	Positive	TcI	n.d.
LCB 1739	n.av.	Las Cruces, NM	32.293721, -106.654317	T. rubida	Hand collection with tweezers	Positive	TcI	n.d.
LCB 1740	n.av.	Las Cruces, NM	32.293721, -106.654317	T. rubida	Hand collection with tweezers	Positive	TcI	n.d.
RPMsp	2019-03-18	El Paso, TX	31.994586, -106.466804	C. intermedius	Sherman trap	Negative	n.a.	n.a.
RPMsp 2	2019-03-18	El Paso, TX	31.994586, -106.466804	C. intermedius	Sherman trap	Negative	n.a.	n.a.
SGSsp	2019-03-18	El Paso, TX	31.994586, -106.466804	X. spilosoma	Tomahawk trap	Positive	TcI+TcIV	n.d.
WHMsp	2019-03-18	El Paso, TX	31.994586, -106.466804	R. megalotis	Sherman trap	Positive	TcI	n.d.
F99	2016	El Paso, TX	31.905386 -106.402117	F. catus	Animal services	Negative	n.a.	n.a.
F100	2016	El Paso, TX	31.641961 -106.274261	F. catus	Animal services	Negative	n.a.	n.a.
F102	2016	El Paso, TX	31.792092 -106.459902	F. catus	Animal services	Negative	n.a.	n.a.
F103	2016	El Paso, TX	31.881338 -106.41722	F. catus	Animal services	Negative	n.a.	n.a.
F138	2016	El Paso, TX	31.616608 -106.233149	F. catus	Animal services	Negative	n.a.	n.a.
F140	2016	El Paso, TX	31.789703 -106.469085	F. catus	Animal services	Negative	n.a.	n.a.
F141	2016	El Paso, TX	31.799249 -106.265013	F. catus	Animal services	Negative	n.a.	n.a.
F142	2016	El Paso, TX	31.869625 -106.419554	F. catus	Animal services	Negative	n.a.	n.a.
F143	2016	El Paso, TX	31.780749 -106.435935	F. catus	Animal services	Negative	n.a.	n.a.
F146	2016	El Paso, TX	31.825978 -106.44186	F. catus	Animal services	Negative	n.a.	n.a.
F147	2016	El Paso, TX	31.775948 -106.441756	F. catus	Animal services	Negative	n.a.	n.a.
F148	2016	El Paso, TX	31.779457 -106.467493	F. catus	Animal services	Negative	n.a.	n.a.
F150	2016	El Paso, TX	31.802297 -106.454858	F. catus	Animal services	Negative	n.a.	n.a.
F151	2016	El Paso, TX	31.775214 -106.42257	F. catus	Animal services	Negative	n.a.	n.a.
F153	2016	El Paso, TX	31.78256 -106.360935	F. catus	Animal services	Negative	n.a.	n.a.
F154	2016	El Paso, TX	31.753744 -106.335799	F. catus	Animal services	Negative	n.a.	n.a.
F155	2016	El Paso, TX	31.634213 -106.291043	F. catus	Animal services	Negative	n.a.	n.a.
F55	2016	El Paso, TX	31.7911892 -106.5106049	F. catus	Animal services	Positive	n.d.	n.a.
F135	2016	El Paso, TX	31.856029 -106.555832	F. catus	Animal services	Positive	TcIV	n.a.
F136	2016	El Paso, TX	31.785006 -106.329227	F. catus	Animal services	Positive	ND	n.a.
F139	2016	El Paso, TX	31.844523 -106.52596	F. catus	Animal services	Positive	ND	n.a.
F144	2016	El Paso, TX	31.701931 -106.273958	F. catus	Animal services	Positive	ND	n.a.
F145	2016	El Paso, TX	31.926931 -106.387078	F. catus	Animal services	Positive	TcI	n.a.
F149	2016	El Paso, TX	31.779457 -106.467493	F. catus	Animal services	Positive	TcI	n.a.
K57	2016	El Paso, TX	? ?	C. lupus familiaris	Animal services	Positive	n.d.	n.a.
K58	2016	El Paso, TX	31.5667362 -106.269989	C. lupus familiaris	Animal services	Positive	TcIV	n.a.
K60	2016	El Paso, TX	31.8750992 -106.4128113	C. lupus familiaris	Animal services	Positive	TcI	n.a.
K62	2016	El Paso, TX	31.7892914 -106.3265915	C. lupus familiaris	Animal services	Positive	TcIV	n.a.
K66	2016	El Paso, TX	31.8763428 -106.4132538	C. lupus familiaris	Animal services	Positive	TcIV	n.a.
K67	2016	El Paso, TX	31.5646343 -106.2266998	C. lupus familiaris	Animal services	Positive	TcI	n.a.
K73	2016	El Paso, TX	31.722787 -106.337217	C. lupus familiaris	Animal services	Positive	TcI	n.a.
K79	2016	El Paso, TX	31.758703 -106.481407	C. lupus familiaris	Animal services	Positive	TcI	n.a.
K80	2016	El Paso, TX	31.636042 -106.163619	C. lupus familiaris	Animal services	Positive	TcI	n.a.
K81	2016	El Paso, TX	31.790824 -106.37485	C. lupus familiaris	Animal services	Positive	TcI	n.a.
K82	2016	El Paso, TX	31.818241 -106.446168	C. lupus familiaris	Animal services	Positive	TcIV	n.a.
K84	2016	El Paso, TX	31.698662 -106.201809	C. lupus familiaris	Animal services	Positive	TcI	n.a.
K89	2016	El Paso, TX	31.918044 -106.343695	C. lupus familiaris	Animal services	Positive	TcI	n.a.
K91	2016	El Paso, TX	31.839359 -106.582539	C. lupus familiaris	Animal services	Positive	TcI	n.a.
K94	2016	El Paso, TX	31.718291 -106.344359	C. lupus familiaris	Animal services	Positive	TcI	n.a.
K97	2016	El Paso, TX	31.81401 -106.145869	C. lupus familiaris	Animal services	Positive	TcI	n.a.
K103	2016	El Paso, TX	31.834864 -106.529664	C. lupus familiaris	Animal services	Positive	TcIV	n.a.
K106	2016	El Paso, TX	31.69725 -106.207232	C. lupus familiaris	Animal services	Positive	TcI	n.a.
K108	2016	El Paso, TX	31.803042 -106.454855	C. lupus familiaris	Animal services	Positive	TcI	n.a.
K110	2016	El Paso, TX	31.915055 -106.435619	C. lupus familiaris	Animal services	Positive	TcI	n.a.
K111	2016	El Paso, TX	31.741638 -106.284697	C. lupus familiaris	Animal services	Positive	n.d.	n.a.
K112	2016	El Paso, TX	31.953092 -106.364771	C. lupus familiaris	Animal services	Positive	TcI	n.a.
K113	2016	El Paso, TX	31.677633 -106.107054	C. lupus familiaris	Animal services	Positive	TcI	n.a.
K115	2016	El Paso, TX	31.685096 -106.320879	C. lupus familiaris	Animal services	Positive	TcI	n.a.
K119	2016	El Paso, TX	31.714259 -106.345528	C. lupus familiaris	Animal services	Positive	TcIV	n.a.
K125	2016	El Paso, TX	31.74315 -106.350639	C. lupus familiaris	Animal services	Positive	TcI	n.a.
K127	2016	El Paso, TX	31.871877 -106.406123	C. lupus familiaris	Animal services	Positive	TcIV	n.a.
K128	2016	El Paso, TX	31.758661 -106.292108	C. lupus familiaris	Animal services	Positive	TcIV	n.a.
K129	2016	El Paso, TX	31.79629 -106.236217	C. lupus familiaris	Animal services	Positive	TcI	n.a.
K130	2016	El Paso, TX	31.750355 -106.388405	C. lupus familiaris	Animal services	Positive	TcI	n.a.
K131	2016	El Paso, TX	31.779331 -106.450674	C. lupus familiaris	Animal services	Positive	TcI	n.a.
K132	2016	El Paso, TX	31.668477 -106.198239	C. lupus familiaris	Animal services	Positive	TcI	n.a.
K133	2016	El Paso, TX	31.799545 -106.445773	C. lupus familiaris	Animal services	Positive	TcI	n.a.
K141	2016	El Paso, TX	31.565115 -106.227614	C. lupus familiaris	Animal services	Positive	TcI	n.a.
K142	2016	El Paso, TX	31.565115 -106.227614	C. lupus familiaris	Animal services	Positive	TcI	n.a.
K145	2016	El Paso, TX	31.709192 -106.305425	C. lupus familiaris	Animal services	Positive	TcI	n.a.
K146	2016	El Paso, TX	31.939314 -106.43085	C. lupus familiaris	Animal services	Positive	n.d.	n.a.
K147	2016	El Paso, TX	31.637501 -106.247492	C. lupus familiaris	Animal services	Positive	TcI	n.a.
K152	2016	El Paso, TX	31.792739 -106.312974	C. lupus familiaris	Animal services	Positive	TcI	n.a.
K153	2016	El Paso, TX	31.863079 -106.421193	C. lupus familiaris	Animal services	Positive	TcI	n.a.
K154	2016	El Paso, TX	31.822866 -106.237175	C. lupus familiaris	Animal services	Positive	TcI	n.a.
K155	2016	El Paso, TX	31.867443 -106.561091	C. lupus familiaris	Animal services	Positive	TcIV	n.a.
K157	2016	El Paso, TX	31.997716 -106.592584	C. lupus familiaris	Animal services	Positive	TcI+TcIV	n.a.
K56	2016	El Paso, TX	31.7251873 -106.3259659	C. lupus familiaris	Animal services	Negative	n.a.	n.a.
K59	2016	El Paso, TX	31.9298763 -106.4129105	C. lupus familiaris	Animal services	Negative	n.a.	n.a.
K61	2016	El Paso, TX	31.624619 -106.253976	C. lupus familiaris	Animal services	Negative	n.a.	n.a.
K63	2016	El Paso, TX	31.8768635 -106.4132767	C. lupus familiaris	Animal services	Negative	n.a.	n.a.
K64	2016	El Paso, TX	31.7714272 -106.364006	C. lupus familiaris	Animal services	Negative	n.a.	n.a.
K65	2016	El Paso, TX	31.5643222 -106.2718456	C. lupus familiaris	Animal services	Negative	n.a.	n.a.
K68	2016	El Paso, TX	31.99967 -106.5757217	C. lupus familiaris	Animal services	Negative	n.a.	n.a.
K69	2016	El Paso, TX	31.8200245 -106.5567551	C. lupus familiaris	Animal services	Negative	n.a.	n.a.
K70	2016	El Paso, TX	31.7649307 -106.3552017	C. lupus familiaris	Animal services	Negative	n.a.	n.a.
K71	2016	El Paso, TX	31.7002586 -106.3303868	C. lupus familiaris	Animal services	Negative	n.a.	n.a.
K72	2016	El Paso, TX	31.7718887 -106.2859116	C. lupus familiaris	Animal services	Negative	n.a.	n.a.
K74	2016	El Paso, TX	31.7988605 -106.4590378	C. lupus familiaris	Animal services	Negative	n.a.	n.a.
K85	2016	El Paso, TX	31.78283 -106.343695	C. lupus familiaris	Animal services	Negative	n.a.	n.a.
K86	2016	El Paso, TX	31.89838 -106.43903	C. lupus familiaris	Animal services	Negative	n.a.	n.a.
K87	2016	El Paso, TX	31.773811 -106.226331	C. lupus familiaris	Animal services	Negative	n.a.	n.a.
K88	2016	El Paso, TX	31.787859 -106.449535	C. lupus familiaris	Animal services	Negative	n.a.	n.a.
K90	2016	El Paso, TX	31.789444 -106.337228	C. lupus familiaris	Animal services	Negative	n.a.	n.a.
K92	2016	El Paso, TX	31.810266 -106.471671	C. lupus familiaris	Animal services	Negative	n.a.	n.a.
K95	2016	El Paso, TX	31.799296 -106.267763	C. lupus familiaris	Animal services	Negative	n.a.	n.a.
K96	2016	El Paso, TX	31.883407 -106.404969	C. lupus familiaris	Animal services	Negative	n.a.	n.a.
K98	2016	El Paso, TX	31.586682 -106.282209	C. lupus familiaris	Animal services	Negative	n.a.	n.a.
K99	2016	El Paso, TX	31.796073 -106.320478	C. lupus familiaris	Animal services	Negative	n.a.	n.a.
K100	2016	El Paso, TX	31.754524 -106.419068	C. lupus familiaris	Animal services	Negative	n.a.	n.a.
K101	2016	El Paso, TX	31.71082 -106.330894	C. lupus familiaris	Animal services	Negative	n.a.	n.a.
K102	2016	El Paso, TX	31.68768 -106.299425	C. lupus familiaris	Animal services	Negative	n.a.	n.a.
K104	2016	El Paso, TX	31.594108 -106.273412	C. lupus familiaris	Animal services	Negative	n.a.	n.a.
K105	2016	El Paso, TX	31.893919 -106.417849	C. lupus familiaris	Animal services	Negative	n.a.	n.a.
K107	2016	El Paso, TX	31.685406 -106.31425	C. lupus familiaris	Animal services	Negative	n.a.	n.a.
K109	2016	El Paso, TX	31.905491 -106.396672	C. lupus familiaris	Animal services	Negative	n.a.	n.a.
K114	2016	El Paso, TX	31.683999 -106.201305	C. lupus familiaris	Animal services	Negative	n.a.	n.a.
K116	2016	El Paso, TX	31.689635 -106.337547	C. lupus familiaris	Animal services	Negative	n.a.	n.a.
K117	2016	El Paso, TX	31.637501 -106.247492	C. lupus familiaris	Animal services	Negative	n.a.	n.a.
K118	2016	El Paso, TX	31.793793 -106.376742	C. lupus familiaris	Animal services	Negative	n.a.	n.a.
K122	2016	El Paso, TX	31.67561 -106.19408	C. lupus familiaris	Animal services	Negative	n.a.	n.a.
K123	2016	El Paso, TX	31.818368 -106.45488	C. lupus familiaris	Animal services	Negative	n.a.	n.a.
K124	2016	El Paso, TX	31.792918 -106.371844	C. lupus familiaris	Animal services	Negative	n.a.	n.a.
K126	2016	El Paso, TX	31.832991 -106.445048	C. lupus familiaris	Animal services	Negative	n.a.	n.a.
K134	2016	El Paso, TX	31.637691 -106.251643	C. lupus familiaris	Animal services	Negative	n.a.	n.a.
K135	2016	El Paso, TX	31.658001 -106.293687	C. lupus familiaris	Animal services	Negative	n.a.	n.a.
K136	2016	El Paso, TX	31.85362 -106.422902	C. lupus familiaris	Animal services	Negative	n.a.	n.a.
K138	2016	El Paso, TX	31.759191 -106.475135	C. lupus familiaris	Animal services	Negative	n.a.	n.a.
K139	2016	El Paso, TX	31.655138 -106.305184	C. lupus familiaris	Animal services	Negative	n.a.	n.a.
K140	2016	El Paso, TX	31.446999 -106.128838	C. lupus familiaris	Animal services	Negative	n.a.	n.a.
K143	2016	El Paso, TX	31.80709 -106.169436	C. lupus familiaris	Animal services	Negative	n.a.	n.a.
K144	2016	El Paso, TX	31.787048 -106.451468	C. lupus familiaris	Animal services	Negative	n.a.	n.a.
K148	2016	El Paso, TX	31.757171 -106.25925	C. lupus familiaris	Animal services	Negative	n.a.	n.a.
K149	2016	El Paso, TX	31.640087 -106.298518	C. lupus familiaris	Animal services	Negative	n.a.	n.a.
K150	2016	El Paso, TX	31.6493 -106.216582	C. lupus familiaris	Animal services	Negative	n.a.	n.a.
K151	2016	El Paso, TX	31.692914 -106.199661	C. lupus familiaris	Animal services	Negative	n.a.	n.a.
K156	2016	El Paso, TX	31.690066 -106.327199	C. lupus familiaris	Animal services	Negative	n.a.	n.a.
K158	2016	El Paso, TX	31.868644 -106.626033	C. lupus familiaris	Animal services	Negative	n.a.	n.a.
K159	2016	El Paso, TX	31.810398 -106.457518	C. lupus familiaris	Animal services	Negative	n.a.	n.a.
a n.av., not available
b n.d., not determined
c n.a., not applicable
