# Supplementary material for: Surveillance of Trypanosoma cruzi infection in Triatomine vectors, feral dogs and cats, and wild animals in and around El Paso county, Texas, and New Mexico
Source: PLoS Negl Trop Dis. 2021 Feb 18;15(2):e0009147. doi: 10.1371/journal.pntd.0009147 (PMC7924784; doi:10.1371/journal.pntd.0009147)
Supplement: S2 Table — (XLSX) [file pntd.0009147.s003.xlsx]

## Sheet: S2 Table
S2 Table. Triatomine and bloodmeal species identified.
Species	GenBank Accession Number	n
Triatomine
T. rubida	JX872243.1	2
T. rubida	MT556664.1	219
T. protracta	MT556662.1	2
T. gearstackery	MT239329.1	2
Bloodmeal
S. audubonii	DQ334836.1	3
A. interpres	U46171.1	3
A. pallidus	AF326088.1	2
C. lupus familiaris	MN699634.1	3
C. lupus familiaris	MN699621.1	1
C. lupus familiaris	MN699611.1	1
C. lupus familiaris	KU290656.1	2
E. caballus	AY584828.1	1
F. catus	NC_001700.1	1
H. sapiens	MN687283.1	2
H. sapiens	MN687299.1	3
H. sapiens	MN595818.1	1
H. sapiens	MK617280.1	1
L. californicus	KJ397614.1	2
M. lucifugus	MF143491.1	2
M. lucifugus	MF362599.1	1
M. muluscus	LC062084.1	19
M. muluscus	LC062071.1	2
N. leudocon	DQ179739.1	3
N. leudocon	DQ179715.1	1
P. maniculatus	MH260579.1	1
P. merriami	EF156828.1	1
